# Supplementary material
Source: PubMed Central journal article supplement (PMC2557066)
Supplement: NIHMS62645-supplement-1File002.pdf [file NIHMS62645-supplement-1File002.pdf]

## Supporting Information

Table 1. Cartesian coordinates (Optimized at B3LYP/6-31G\* level, in vacuo) of conformers used in the calculation

### 1. Conformer 1 of atRAL dimer E (low energy conformer)

|   |             |             |             |
|---|-------------|-------------|-------------|
| C | 1.63741600  | 3.34350000  | -0.66272100 |
| C | 1.34027800  | 4.67733800  | -0.95186600 |
| C | 0.01944000  | 5.11797900  | -1.06782500 |
| C | -1.09577900 | 4.34624900  | -0.71529900 |
| C | 2.98251800  | 2.92494000  | -0.54943200 |
| C | 3.42541500  | 1.63478800  | -0.31633100 |
| C | 4.79298200  | 1.29179400  | -0.23800500 |
| C | 5.33185300  | 0.03443700  | -0.01183800 |
| C | 6.76575800  | -0.08242900 | 0.02090400  |
| C | 7.45508500  | -1.25064800 | 0.18009500  |
| C | 8.89839200  | -1.45718500 | 0.20394500  |
| C | 4.48406800  | -1.19578500 | 0.19573500  |
| C | 9.35905300  | -2.78428400 | -0.45482300 |
| C | 10.88174700 | -2.76025900 | -0.72214400 |
| C | 11.68647000 | -2.26093400 | 0.47332900  |
| C | 11.26481400 | -0.83317300 | 0.82062200  |
| C | 9.76859500  | -0.59601100 | 0.81084000  |
| C | 9.36253200  | 0.65859100  | 1.54775800  |
| C | 8.65855600  | -2.98455000 | -1.81914400 |
| C | 9.00461400  | -3.97614800 | 0.46756900  |
| C | -2.34350200 | 4.96127400  | -0.85702300 |
| N | -3.53596800 | 4.46017200  | -0.54593700 |
| C | -4.80399400 | 5.16209000  | -0.71433700 |
| C | -5.41970000 | 5.58003500  | 0.62470700  |
| O | -6.65041200 | 6.19296700  | 0.29913400  |
| H | 2.14994200  | 5.37985000  | -1.12724700 |
| H | -0.14997300 | 6.13472600  | -1.41904700 |
| H | 3.73817000  | 3.70064400  | -0.66984800 |
| H | 2.68775900  | 0.84779700  | -0.19100000 |
| H | 5.49958300  | 2.10957100  | -0.37515300 |
| H | 7.31853500  | 0.83940500  | -0.13608000 |
| H | 6.86557000  | -2.16415700 | 0.22887800  |
| H | 4.70521700  | -1.94976800 | -0.56902700 |
| H | 4.69732100  | -1.65259500 | 1.16878900  |
| H | 3.41435800  | -0.98945300 | 0.15349800  |
| H | 11.20253700 | -3.76724200 | -1.01687500 |
| H | 11.08110800 | -2.10580500 | -1.58262100 |
| H | 12.76007800 | -2.29124600 | 0.25570600  |
| H | 11.52676100 | -2.91402200 | 1.34000900  |
| H | 11.66696000 | -0.54134200 | 1.79926400  |
| H | 11.71665500 | -0.12701500 | 0.10351600  |
| H | 9.99054100  | 0.78961300  | 2.43636200  |
| H | 9.52168500  | 1.55183800  | 0.92605100  |
| H | 8.31847700  | 0.65562900  | 1.86615300  |
| H | 9.05773700  | -3.87815700 | -2.31291900 |
| H | 7.57624400  | -3.12335300 | -1.72190800 |
| H | 8.83040300  | -2.12894200 | -2.48202000 |
| H | 9.52014200  | -3.91323600 | 1.43090800  |

|   |              |             |             |
|---|--------------|-------------|-------------|
| H | 7.92944300   | -4.02964900 | 0.67437300  |
| H | 9.28944800   | -4.92075600 | -0.01091300 |
| H | -2.37066700  | 5.96799900  | -1.27141300 |
| H | -3.55815200  | 3.49642800  | -0.21297500 |
| H | -5.50804000  | 4.51266400  | -1.24492500 |
| H | -4.63839500  | 6.04844200  | -1.33322200 |
| H | -4.73249100  | 6.26597500  | 1.14502300  |
| H | -5.55228000  | 4.69139500  | 1.26355300  |
| H | -7.08344500  | 6.48091400  | 1.11678200  |
| C | -0.85892500  | 2.97461200  | -0.05480600 |
| C | 0.47244200   | 2.37827500  | -0.60969600 |
| H | 0.30220600   | 2.02535400  | -1.63814000 |
| H | 0.70804900   | 1.48988700  | -0.01778800 |
| C | -0.72631800  | 3.19981000  | 1.46908800  |
| H | -0.49383400  | 2.26097500  | 1.98374700  |
| H | 0.07826000   | 3.90904100  | 1.68378600  |
| H | -1.65075000  | 3.60302200  | 1.89569400  |
| C | -1.94550700  | 1.97140900  | -0.40856500 |
| C | -2.67740400  | 1.21601900  | 0.44396800  |
| H | -2.08396500  | 1.81704600  | -1.48101500 |
| C | -3.63859000  | 0.22485100  | 0.01353000  |
| H | -2.53676800  | 1.35043400  | 1.51349700  |
| C | -4.42235900  | -0.57308400 | 0.79677700  |
| H | -3.72882100  | 0.10169400  | -1.06620100 |
| C | -5.30857200  | -1.52444100 | 0.13955000  |
| C | -4.41473800  | -0.52579100 | 2.30602700  |
| C | -6.16047500  | -2.37569100 | 0.75872800  |
| H | -5.27324200  | -1.52304600 | -0.94835600 |
| H | -3.72901000  | 0.22210900  | 2.70779800  |
| H | -5.41630300  | -0.29841200 | 2.69101000  |
| H | -4.12876200  | -1.49863500 | 2.72307600  |
| C | -7.05870700  | -3.33975800 | 0.10045900  |
| H | -6.23624100  | -2.31710400 | 1.84231300  |
| C | -6.64584100  | -4.14351600 | -0.91413500 |
| C | -8.50464000  | -3.37229500 | 0.65539200  |
| C | -7.58537500  | -5.07394300 | -1.65347400 |
| C | -5.21796200  | -4.26137100 | -1.39545200 |
| C | -9.29123500  | -4.57784800 | 0.08954900  |
| C | -8.50591100  | -3.51154100 | 2.19701300  |
| C | -9.22107000  | -2.05140000 | 0.28561700  |
| C | -9.06432800  | -4.78499500 | -1.40565000 |
| H | -7.35537800  | -5.02179400 | -2.72777700 |
| H | -7.35136100  | -6.11106000 | -1.36183800 |
| H | -4.97317700  | -5.31957500 | -1.55888900 |
| H | -5.07916600  | -3.76401800 | -2.36617200 |
| H | -4.49083500  | -3.84412300 | -0.69649600 |
| H | -10.35716500 | -4.43944700 | 0.31066400  |
| H | -8.97791600  | -5.48842600 | 0.62026500  |
| H | -8.14887800  | -2.60927000 | 2.70489900  |
| H | -9.52934900  | -3.68986500 | 2.54719500  |
| H | -7.88950200  | -4.35764000 | 2.52272300  |
| H | -8.66586400  | -1.18390200 | 0.66017100  |
| H | -10.22638500 | -2.02373100 | 0.72370300  |
| H | -9.31994200  | -1.93446800 | -0.79893900 |
| H | -9.68043800  | -5.61107600 | -1.77955700 |
| H | -9.36820500  | -3.89053400 | -1.96436800 |

## 2.. Conformer 2 of atRAL dimer E (high energy conformer)

|   |             |             |             |
|---|-------------|-------------|-------------|
| C | 1.63686900  | 1.65983400  | -0.61243800 |
| C | 1.68243500  | 3.02236200  | -0.92004500 |
| C | 0.50803200  | 3.76802200  | -1.04302000 |
| C | -0.76620700 | 3.30158700  | -0.68870800 |
| C | 2.76584800  | 0.82100300  | -0.44410700 |
| C | 4.09368200  | 1.21107000  | -0.49215900 |
| C | 5.16915600  | 0.31422300  | -0.32631900 |
| C | 6.52398700  | 0.61324900  | -0.35645300 |
| C | 7.45112400  | -0.47288500 | -0.18495200 |
| C | 8.81097400  | -0.34712300 | -0.14813200 |
| C | 9.81293600  | -1.39101800 | 0.02780900  |
| C | 7.05039700  | 2.01117300  | -0.56534200 |
| C | 11.04680000 | -0.95251900 | 0.85895600  |
| C | 11.86357700 | -2.18525200 | 1.31118800  |
| C | 12.10608400 | -3.18454200 | 0.18467800  |
| C | 10.76871600 | -3.69605800 | -0.35237200 |
| C | 9.71368500  | -2.62716700 | -0.54657400 |
| C | 8.57943600  | -3.07013700 | -1.44053200 |
| C | 10.60066100 | -0.20525500 | 2.13791900  |
| C | 11.93729300 | -0.00897900 | 0.01479300  |
| C | -1.82017900 | 4.20567500  | -0.84261700 |
| N | -3.10112700 | 4.02110900  | -0.53113100 |
| C | -4.15551300 | 5.01006500  | -0.72651500 |
| C | -4.67350000 | 5.57965600  | 0.59768200  |
| O | -5.70263900 | 6.48120000  | 0.24371700  |
| H | 2.62922300  | 3.51824800  | -1.10602600 |
| H | 0.59393100  | 4.79221000  | -1.40336300 |
| H | 2.56306400  | -0.23241100 | -0.25738400 |
| H | 4.31733300  | 2.26002200  | -0.66523600 |
| H | 4.90154600  | -0.72918300 | -0.16331800 |
| H | 7.00816500  | -1.45415600 | -0.04081000 |
| H | 9.21040300  | 0.66430200  | -0.18980200 |
| H | 7.69309200  | 2.30906000  | 0.27132300  |
| H | 7.66047800  | 2.06380100  | -1.47439200 |
| H | 6.25970200  | 2.75668300  | -0.65153300 |
| H | 12.81350300 | -1.84029800 | 1.73824900  |
| H | 11.32307100 | -2.69100100 | 2.12405800  |
| H | 12.71231200 | -4.02550300 | 0.53981700  |
| H | 12.67406100 | -2.71418100 | -0.62740100 |
| H | 10.91429900 | -4.23080900 | -1.29980100 |
| H | 10.35283500 | -4.44841700 | 0.33907200  |
| H | 8.96597200  | -3.69831000 | -2.25114800 |
| H | 7.85979900  | -3.69187400 | -0.88803200 |
| H | 8.02910600  | -2.23971300 | -1.88638500 |
| H | 11.47401600 | 0.01497700  | 2.76270600  |
| H | 10.10906000 | 0.74946100  | 1.92020600  |
| H | 9.90805000  | -0.81337700 | 2.73076500  |
| H | 12.32447500 | -0.50657300 | -0.87961900 |
| H | 11.39153000 | 0.88212400  | -0.31639400 |
| H | 12.79079900 | 0.33708500  | 0.60971500  |
| H | -1.59611000 | 5.18227600  | -1.26928900 |
| H | -3.36383500 | 3.09725200  | -0.18856700 |
| H | -4.98811500 | 4.54902200  | -1.26821500 |
| H | -3.76687900 | 5.82351100  | -1.34573400 |

|   |              |             |             |
|---|--------------|-------------|-------------|
| H | -3.84651400  | 6.07414400  | 1.13168200  |
| H | -5.04000400  | 4.75871700  | 1.23572800  |
| H | -6.07313700  | 6.86688300  | 1.05176100  |
| C | -0.88126700  | 1.91844500  | -0.01869000 |
| C | 0.26534900   | 1.01811300  | -0.56893200 |
| H | 0.01891200   | 0.72486700  | -1.60162400 |
| H | 0.28966300   | 0.09054100  | 0.01247000  |
| C | -0.70469300  | 2.11077300  | 1.50483100  |
| H | -0.71271400  | 1.14652100  | 2.02470100  |
| H | 0.24862100   | 2.60133300  | 1.72182400  |
| H | -1.50385200  | 2.73106200  | 1.92409500  |
| C | -2.18037800  | 1.21470500  | -0.37687300 |
| C | -3.07664700  | 0.66132700  | 0.47345600  |
| H | -2.35071800  | 1.10241200  | -1.44995400 |
| C | -4.25592900  | -0.05580900 | 0.04191500  |
| H | -2.90702300  | 0.75295400  | 1.54315400  |
| C | -5.20676700  | -0.64398300 | 0.82561700  |
| H | -4.38377100  | -0.13656500 | -1.03798100 |
| C | -6.31512500  | -1.32462600 | 0.16884100  |
| C | -5.16912300  | -0.62921700 | 2.33521000  |
| C | -7.35146000  | -1.93604900 | 0.78981600  |
| H | -6.29518800  | -1.31087400 | -0.91938600 |
| H | -4.30471800  | -0.09828500 | 2.73759900  |
| H | -6.07017700  | -0.15340100 | 2.74110300  |
| H | -5.14488200  | -1.65142300 | 2.73075100  |
| C | -8.48316000  | -2.61314100 | 0.13367100  |
| H | -7.39403800  | -1.88208100 | 1.87541700  |
| C | -8.31587300  | -3.47263100 | -0.90488500 |
| C | -9.87604200  | -2.27383900 | 0.72083400  |
| C | -9.48138900  | -4.09932700 | -1.64201700 |
| C | -6.97858600  | -3.95293000 | -1.42015500 |
| C | -10.96801900 | -3.20430500 | 0.14193400  |
| C | -9.89143600  | -2.45611800 | 2.25791100  |
| C | -10.21724400 | -0.79822800 | 0.40228700  |
| C | -10.82292500 | -3.42570700 | -1.36139900 |
| H | -9.26031800  | -4.08768800 | -2.71935100 |
| H | -9.53297300  | -5.16718800 | -1.37292600 |
| H | -7.02623800  | -5.03366700 | -1.61025200 |
| H | -6.72829300  | -3.48570600 | -2.38349500 |
| H | -6.15548300  | -3.76150700 | -0.72943200 |
| H | -11.95302800 | -2.78588300 | 0.38515600  |
| H | -10.91067800 | -4.17960800 | 0.64637200  |
| H | -9.29694400  | -1.69939300 | 2.78080700  |
| H | -10.91994300 | -2.36354200 | 2.62583000  |
| H | -9.52050400  | -3.44642800 | 2.54687200  |
| H | -9.44111000  | -0.12340400 | 0.78092800  |
| H | -11.16857100 | -0.51459100 | 0.86902900  |
| H | -10.30406100 | -0.62688300 | -0.67610300 |
| H | -11.64530100 | -4.04209800 | -1.74297700 |
| H | -10.87636400 | -2.46744200 | -1.89374400 |

### 3. Conformer 1 of dihydro-A2E (low energy conformer)

|   |            |            |             |
|---|------------|------------|-------------|
| C | 1.56794700 | 2.75224300 | -0.34849700 |
| C | 0.33108300 | 3.47248700 | 0.22150100  |
| N | 0.28631100 | 4.88154400 | -0.31549800 |

|   |              |             |             |
|---|--------------|-------------|-------------|
| C | 1.43597000   | 5.53025600  | -0.45989700 |
| C | 2.69830800   | 4.94407900  | -0.31958700 |
| C | 2.84405100   | 3.56024100  | -0.23057000 |
| C | -0.98870300  | 5.60021400  | -0.44456400 |
| C | -1.53554200  | 5.58910500  | -1.87550800 |
| O | -2.70978500  | 6.37444900  | -1.83068400 |
| C | 4.12292100   | 2.96996200  | -0.14664500 |
| C | -0.91238900  | 2.68999100  | -0.07099400 |
| C | 4.39403300   | 1.61293300  | -0.09886300 |
| C | 5.70336900   | 1.09204800  | -0.03853500 |
| C | 6.07605200   | -0.24380900 | 0.01333900  |
| C | 7.48177600   | -0.54011700 | 0.07049600  |
| C | 8.02230500   | -1.79525500 | 0.07589400  |
| C | 5.07831500   | -1.37490000 | 0.01156700  |
| C | 9.42876800   | -2.17334500 | 0.11588100  |
| C | 10.35872500  | -1.51741600 | 0.87357800  |
| C | 11.81697300  | -1.92579000 | 0.89606300  |
| C | 12.10160100  | -3.32136300 | 0.33892400  |
| C | 11.29733900  | -3.54304700 | -0.93815100 |
| C | 9.77091500   | -3.43603100 | -0.71704200 |
| C | 10.05812000  | -0.34425500 | 1.77613700  |
| C | 9.11022500   | -3.36079500 | -2.11383400 |
| C | 9.25139100   | -4.69899400 | 0.01161400  |
| C | -1.87177900  | 2.28357900  | 0.80300900  |
| C | -2.96537400  | 1.46839900  | 0.29771600  |
| C | -4.01601300  | 0.99427200  | 1.02081700  |
| C | -5.06698300  | 0.19709200  | 0.45389700  |
| C | -6.16895500  | -0.31153200 | 1.08690500  |
| C | -7.11043700  | -1.09179900 | 0.29947100  |
| C | -6.45727300  | -0.10097000 | 2.55325500  |
| C | -8.26724100  | -1.63458900 | 0.74973000  |
| C | -9.24692400  | -2.40452900 | -0.03428500 |
| C | -1.87150600  | 2.63141700  | 2.27510900  |
| C | -10.72117300 | -2.00477000 | 0.22395700  |
| C | -11.64172100 | -2.56603300 | -0.88406900 |
| C | -11.35963300 | -4.03106300 | -1.20512800 |
| C | -9.91725900  | -4.18683900 | -1.68866900 |
| C | -8.89705500  | -3.41287600 | -0.87483000 |
| C | -7.48095900  | -3.89388500 | -1.09429300 |
| C | -10.87262900 | -0.46627300 | 0.21588000  |
| C | -11.17348900 | -2.53922500 | 1.60507200  |
| H | 1.64258800   | 1.79139100  | 0.16601000  |
| H | 1.39986100   | 2.52425800  | -1.41206600 |
| H | 0.47246900   | 3.59114300  | 1.30310700  |
| H | 1.35639000   | 6.59099300  | -0.68615800 |
| H | 3.56705000   | 5.59247700  | -0.35321500 |
| H | -1.71815000  | 5.14037800  | 0.22310100  |
| H | -0.84414100  | 6.63805500  | -0.12972300 |
| H | -0.77956600  | 6.00885500  | -2.55985500 |
| H | -1.73604500  | 4.55409600  | -2.18974500 |
| H | -3.13536600  | 6.35150300  | -2.70089900 |
| H | 4.96982300   | 3.65466000  | -0.12827800 |
| H | -1.01150100  | 2.37581400  | -1.11036100 |
| H | 3.56007600   | 0.91699500  | -0.10929000 |
| H | 6.50929100   | 1.82481800  | -0.03389900 |
| H | 8.14592400   | 0.31934200  | 0.06841900  |
| H | 7.32961300   | -2.62783000 | -0.03182400 |

|   |              |             |             |
|---|--------------|-------------|-------------|
| H | 4.04396100   | -1.03320800 | -0.03399900 |
| H | 5.24620200   | -2.03421200 | -0.84816600 |
| H | 5.18775600   | -1.98770400 | 0.91335200  |
| H | 12.19757500  | -1.83604800 | 1.92163300  |
| H | 12.37749600  | -1.17269900 | 0.31653400  |
| H | 13.17389700  | -3.43323300 | 0.14306000  |
| H | 11.84327900  | -4.07878700 | 1.08906400  |
| H | 11.52137500  | -4.52458100 | -1.37399900 |
| H | 11.60116400  | -2.79460200 | -1.68374900 |
| H | 10.34697700  | 0.60446500  | 1.30059000  |
| H | 9.00591000   | -0.27072200 | 2.05634100  |
| H | 10.65151500  | -0.41745200 | 2.69458600  |
| H | 8.01626000   | -3.39333500 | -2.06518800 |
| H | 9.43287400   | -4.21305100 | -2.72309900 |
| H | 9.39759900   | -2.44359800 | -2.64031200 |
| H | 9.45441400   | -5.59208300 | -0.59113100 |
| H | 8.16849300   | -4.66033400 | 0.17793400  |
| H | 9.72713300   | -4.83138200 | 0.98813500  |
| H | -2.92555700  | 1.22760100  | -0.76471600 |
| H | -4.07111500  | 1.22869000  | 2.08039700  |
| H | -4.96608400  | -0.01957300 | -0.60987300 |
| H | -6.85242900  | -1.21537400 | -0.75055300 |
| H | -7.41091700  | 0.42392600  | 2.68900300  |
| H | -5.68604900  | 0.48095300  | 3.06025300  |
| H | -6.54589500  | -1.06245300 | 3.07279100  |
| H | -8.55261800  | -1.43418900 | 1.78183900  |
| H | -1.02365800  | 3.25068100  | 2.57437500  |
| H | -1.85155400  | 1.72177800  | 2.88622800  |
| H | -2.78604700  | 3.17412800  | 2.54091100  |
| H | -12.68754400 | -2.42600800 | -0.58115800 |
| H | -11.49955800 | -1.97052100 | -1.79739500 |
| H | -11.52021200 | -4.65215000 | -0.31490800 |
| H | -12.05510000 | -4.39887800 | -1.96890300 |
| H | -9.63354100  | -5.24783800 | -1.70301800 |
| H | -9.83975300  | -3.85521600 | -2.73786000 |
| H | -7.45344700  | -4.99115500 | -1.08517100 |
| H | -6.78059500  | -3.52759800 | -0.34212800 |
| H | -7.10488000  | -3.58759300 | -2.08165700 |
| H | -11.92974000 | -0.19340000 | 0.32084800  |
| H | -10.32548500 | 0.01109200  | 1.03576700  |
| H | -10.50561000 | -0.03859400 | -0.72420800 |
| H | -10.54515900 | -2.15516500 | 2.41671200  |
| H | -12.20316500 | -2.22463100 | 1.81483400  |
| H | -11.13528700 | -3.63219200 | 1.64953200  |

#### 4. Conformer 2 of dihydro-A2E (high energy conformer)

|   |             |            |             |
|---|-------------|------------|-------------|
| C | 1.54921400  | 2.68845100 | -0.45494600 |
| C | 0.31254400  | 3.42097900 | 0.09805500  |
| N | 0.26616900  | 4.81960800 | -0.47138800 |
| C | 1.41657700  | 5.46516900 | -0.61136200 |
| C | 2.67777500  | 4.87604800 | -0.45323100 |
| C | 2.82461700  | 3.49543000 | -0.34113000 |
| C | -1.04418600 | 5.48280200 | -0.54329500 |
| C | -1.04344600 | 6.87391200 | -1.17483700 |
| O | -2.41203600 | 7.22036500 | -1.25574800 |

|   |              |             |             |
|---|--------------|-------------|-------------|
| C | 4.10343100   | 2.90573300  | -0.23792900 |
| C | -0.93100000  | 2.63477900  | -0.18272800 |
| C | 4.37230500   | 1.55005500  | -0.16843500 |
| C | 5.68077600   | 1.02744700  | -0.08886700 |
| C | 6.05031700   | -0.30762700 | -0.01655300 |
| C | 7.45541600   | -0.60625300 | 0.05734100  |
| C | 7.99340300   | -1.86171500 | 0.08264600  |
| C | 5.05088800   | -1.43723800 | -0.01383800 |
| C | 9.39960000   | -2.24082900 | 0.13966000  |
| C | 10.32216300  | -1.58022300 | 0.90158800  |
| C | 11.77981400  | -1.98979600 | 0.94297000  |
| C | 12.06907500  | -3.38932900 | 0.39805000  |
| C | 11.27755100  | -3.61908100 | -0.88551400 |
| C | 9.74901300   | -3.50955400 | -0.68063200 |
| C | 10.01345500  | -0.39928300 | 1.79130400  |
| C | 9.10252500   | -3.44380800 | -2.08451200 |
| C | 9.22131300   | -4.76701000 | 0.05169500  |
| C | -1.88726300  | 2.23682600  | 0.69802600  |
| C | -2.98320100  | 1.41816200  | 0.20397100  |
| C | -4.03073200  | 0.95130300  | 0.93640600  |
| C | -5.08508700  | 0.14931200  | 0.38290400  |
| C | -6.18275600  | -0.35351400 | 1.02800100  |
| C | -7.12877400  | -1.14268400 | 0.25499800  |
| C | -6.46177500  | -0.12829200 | 2.49404900  |
| C | -8.28190900  | -1.68155400 | 0.71908000  |
| C | -9.26596000  | -2.46201500 | -0.04900800 |
| C | -1.88295800  | 2.59927800  | 2.16640400  |
| C | -10.73881800 | -2.05928300 | 0.21257400  |
| C | -11.66608700 | -2.63750500 | -0.88103900 |
| C | -11.38436400 | -4.10664600 | -1.18317300 |
| C | -9.94522100  | -4.26726700 | -1.67463700 |
| C | -8.92055000  | -3.48135900 | -0.87803900 |
| C | -7.50538800  | -3.96386900 | -1.10008300 |
| C | -10.89097000 | -0.52113700 | 0.18229900  |
| C | -11.18223900 | -2.57284600 | 1.60447600  |
| H | 1.61731900   | 1.73458300  | 0.07344400  |
| H | 1.38464200   | 2.44651400  | -1.51578000 |
| H | 0.45055900   | 3.56435500  | 1.17724900  |
| H | 1.35952200   | 6.52114500  | -0.85203200 |
| H | 3.54650100   | 5.52404100  | -0.49597800 |
| H | -1.71463100  | 4.84537800  | -1.12432200 |
| H | -1.46696200  | 5.54580800  | 0.46694400  |
| H | -0.48363200  | 7.59045000  | -0.55286400 |
| H | -0.56616000  | 6.83949700  | -2.16787100 |
| H | -2.48408400  | 8.12246700  | -1.60264700 |
| H | 4.95048300   | 3.59036100  | -0.22313900 |
| H | -1.03482400  | 2.31483600  | -1.22021800 |
| H | 3.53746200   | 0.85512500  | -0.17666700 |
| H | 6.48781900   | 1.75903500  | -0.08632200 |
| H | 8.12126600   | 0.25196200  | 0.05154200  |
| H | 7.30065000   | -2.69480300 | -0.02090600 |
| H | 4.01740600   | -1.09454300 | -0.07056000 |
| H | 5.22405500   | -2.10565500 | -0.86548700 |
| H | 5.15277300   | -2.04092400 | 0.89495900  |
| H | 12.14869200  | -1.89399200 | 1.97231600  |
| H | 12.34796800  | -1.24109300 | 0.36522000  |
| H | 13.14322500  | -3.50329500 | 0.21372100  |

|   |              |             |             |
|---|--------------|-------------|-------------|
| H | 11.80269800  | -4.14162100 | 1.15056100  |
| H | 11.50538100  | -4.60365100 | -1.31251500 |
| H | 11.58939100  | -2.87578600 | -1.63296400 |
| H | 10.30947400  | 0.54517800  | 1.31167400  |
| H | 8.95813000   | -0.32159900 | 2.05849500  |
| H | 10.59603600  | -0.46624100 | 2.71718700  |
| H | 8.00811500   | -3.47536500 | -2.04652000 |
| H | 9.43090500   | -4.30036400 | -2.68463900 |
| H | 9.39563300   | -2.53033600 | -2.61429600 |
| H | 9.43048700   | -5.66467400 | -0.54211100 |
| H | 8.13671400   | -4.72681500 | 0.20606900  |
| H | 9.68654500   | -4.89211200 | 1.03421800  |
| H | -2.94846900  | 1.16883500  | -0.85658600 |
| H | -4.08017100  | 1.19517400  | 1.99410400  |
| H | -4.99087700  | -0.07714800 | -0.67938000 |
| H | -6.87759400  | -1.27760300 | -0.79528400 |
| H | -7.41399400  | 0.39902200  | 2.63054900  |
| H | -5.68686500  | 0.45779000  | 2.99052100  |
| H | -6.54812200  | -1.08445400 | 3.02368800  |
| H | -8.56046000  | -1.46978900 | 1.75078100  |
| H | -1.03017400  | 3.21509300  | 2.45882100  |
| H | -1.86933400  | 1.69630700  | 2.78746700  |
| H | -2.79336900  | 3.15175900  | 2.42634000  |
| H | -12.71004700 | -2.49431900 | -0.57322400 |
| H | -11.53065400 | -2.05504200 | -1.80372200 |
| H | -11.53787500 | -4.71525700 | -0.28313700 |
| H | -12.08468900 | -4.48606100 | -1.93678400 |
| H | -9.66023800  | -5.32802600 | -1.67676100 |
| H | -9.87547300  | -3.94952100 | -2.72864100 |
| H | -7.47640900  | -5.06088900 | -1.07544300 |
| H | -6.80044700  | -3.58592800 | -0.35803900 |
| H | -7.13641900  | -3.67121700 | -2.09422200 |
| H | -11.94745800 | -0.24694600 | 0.29041500  |
| H | -10.33829700 | -0.03145600 | 0.99113600  |
| H | -10.53048000 | -0.10757900 | -0.76657700 |
| H | -10.54996800 | -2.17511900 | 2.40640500  |
| H | -12.21118400 | -2.25656800 | 1.81524600  |
| H | -11.14190200 | -3.66490500 | 1.66600000  |



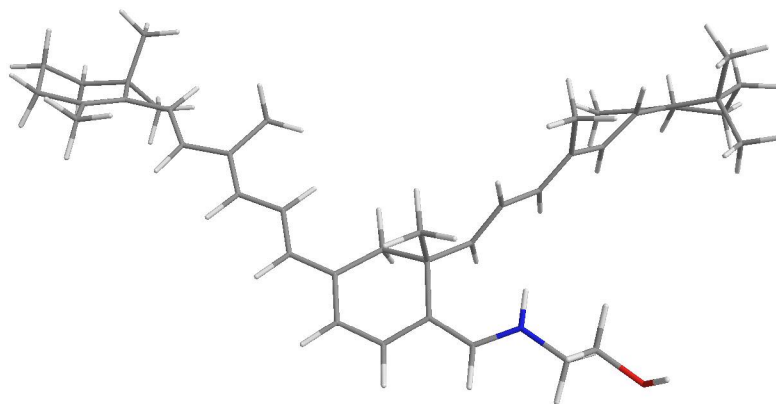

**A**

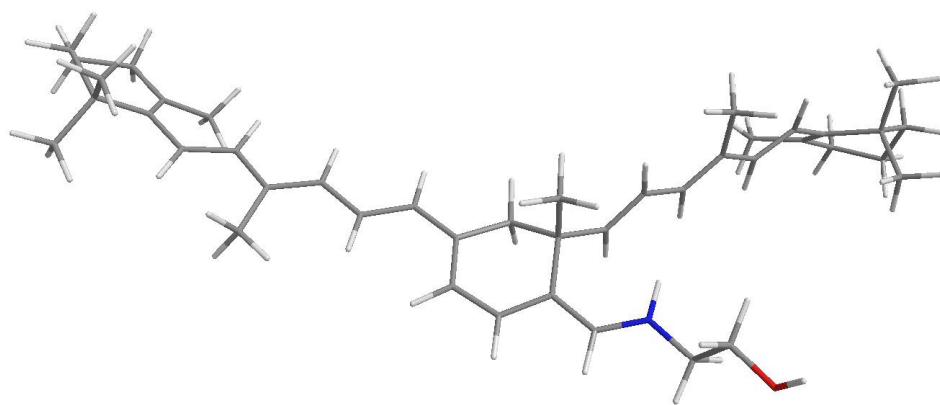

**B**

Figure 1: Stick models of atRAL dimer E used to calculate UV-visible absorbance spectra. (A) conformer 1. (B) conformer 2.

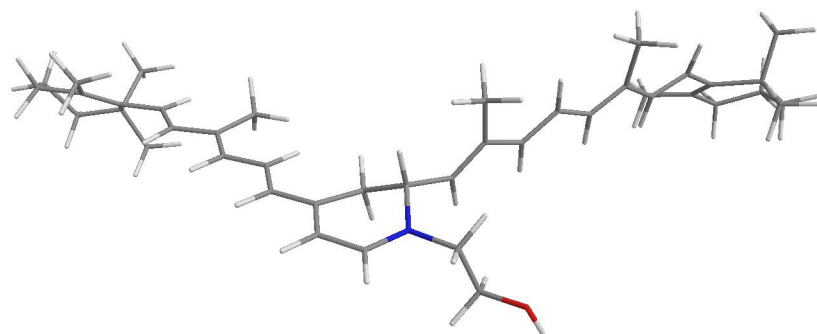

**A.**

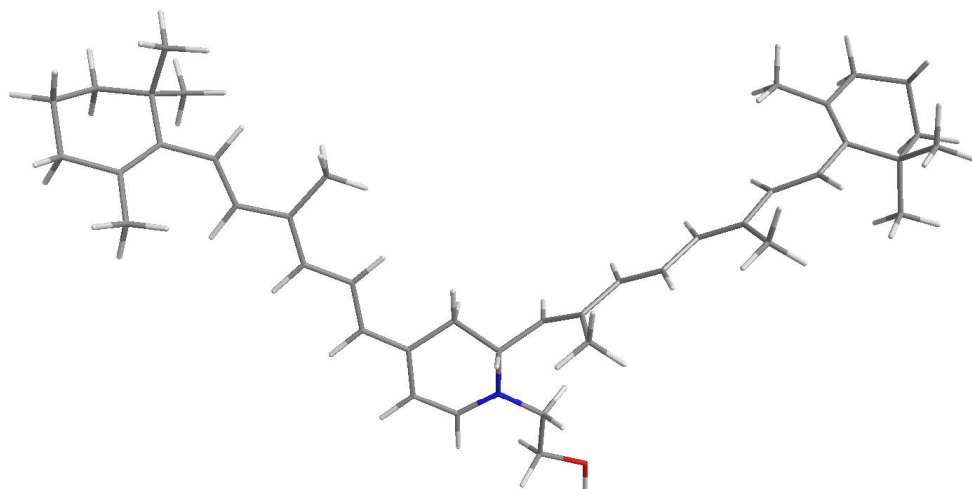

**B**

Figure 2: Stick models of dihydro-A2E used to calculate UV-visible absorbance spectra. (A) conformer 1. (B) conformer 2.
